# Supplementary material for: Docosahexaenoic Acid Inhibits Cell Proliferation through a Suppression of c-Myc Protein in Pancreatic Ductal Adenocarcinoma Cells
Source: MDPI journal article supplement (doi:10.3390/antiox10111721), 2021-10-28
Supplement: s1 [file s1]

# Supporting Information

Fig. 1D

|             | 1                                                                                   | 2                                                                                     |
|-------------|-------------------------------------------------------------------------------------|---------------------------------------------------------------------------------------|
| p-Rb (S795) | 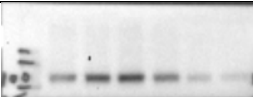   |    |
| Rb          |    |    |
| Cyclin D1   |    |    |
| Cyclin E    |    |    |
| Cyclin A    |   |   |
| E2F1        |  |  |
| c-Myc       |  |  |
| Lamin A     |  |  |

Fig. 2B

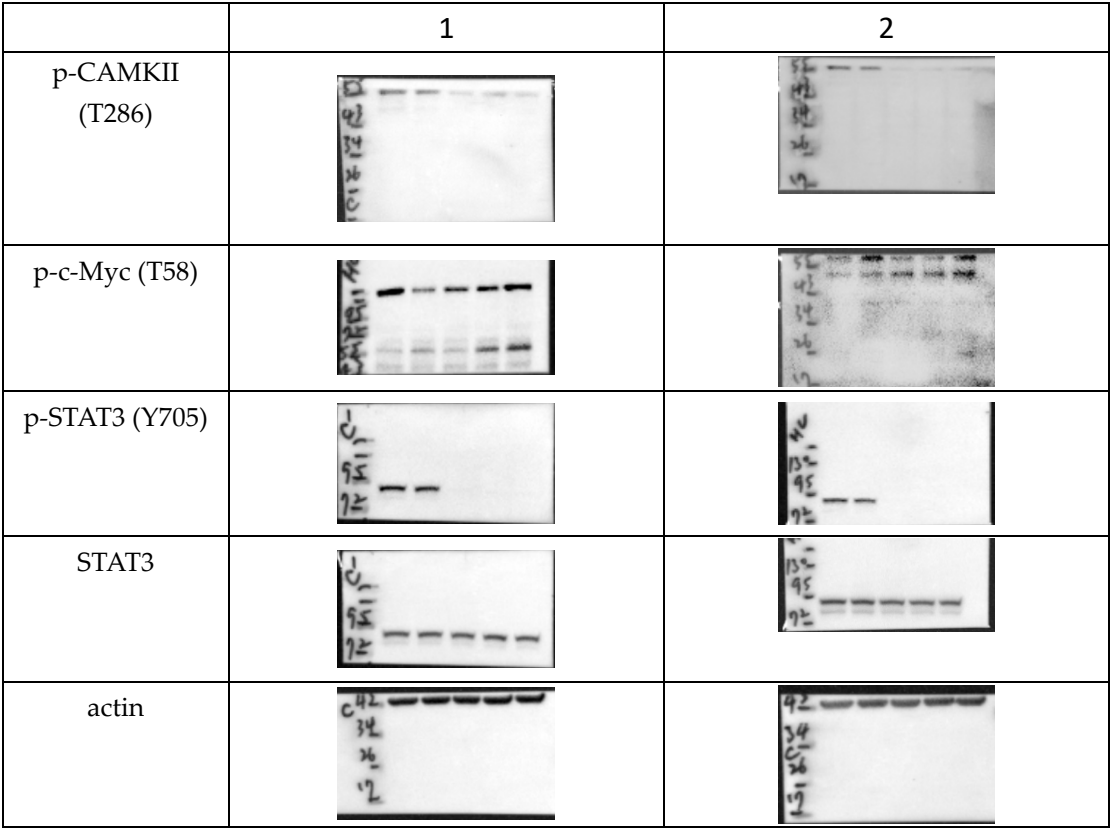

Fig. 2C

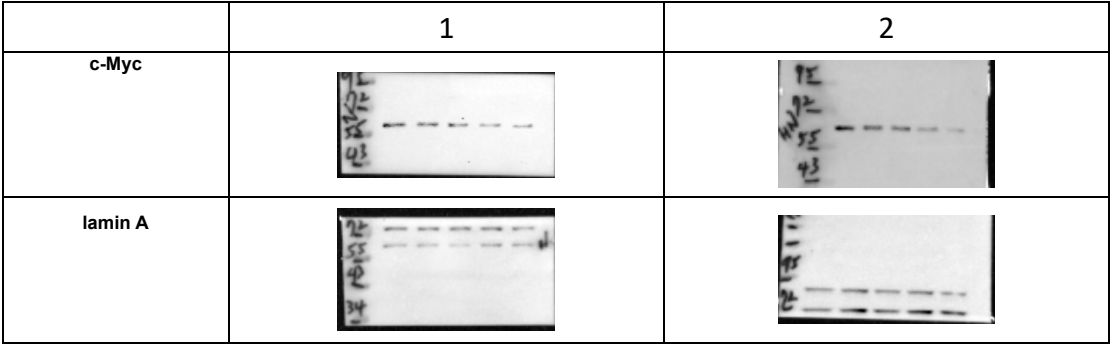

Fig. 3A

|                 | 1                                                                                   | 2                                                                                    |
|-----------------|-------------------------------------------------------------------------------------|--------------------------------------------------------------------------------------|
| p-EGFR (Y1068)  | 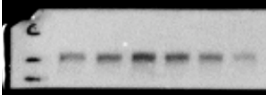   |    |
| p-STAT3 (Y705)  |    |    |
| t-STAT3         |    |    |
| p-CAMKII (T286) |    |    |
| p-c-Myc (T58)   |    |   |
| actin           |  |  |

Fig. 3B

|         | 1                                                                                   | 2                                                                                     |
|---------|-------------------------------------------------------------------------------------|---------------------------------------------------------------------------------------|
| c-Myc   | 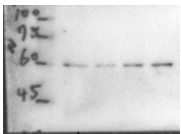 |  |
| Lamin A |  |  |

Fig. 4E

| DHA ( $\mu$ M)    | 0                                                                                   | 150 | 0 | 150 | 0   | 150 | 0                                                                                    | 150 | 0 | 150 | 0   | 150 |
|-------------------|-------------------------------------------------------------------------------------|-----|---|-----|-----|-----|--------------------------------------------------------------------------------------|-----|---|-----|-----|-----|
| GSH (mM)          | 0                                                                                   | 0   | 5 | 5   | 0   | 0   | 0                                                                                    | 0   | 5 | 5   | 0   | 0   |
| NAC (mM)          | 0                                                                                   | 0   | 0 | 0   | 2.5 | 2.5 | 0                                                                                    | 0   | 0 | 0   | 2.5 | 2.5 |
| p-CAMKII (Thr286) | 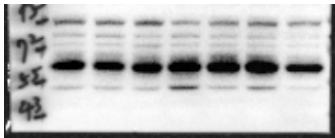   |     |   |     |     |     |    |     |   |     |     |     |
| p-c-myc (T58)     |    |     |   |     |     |     |    |     |   |     |     |     |
| c-caspase3        |   |     |   |     |     |     |    |     |   |     |     |     |
| actin             |  |     |   |     |     |     |  |     |   |     |     |     |

Fig. 5D

|            | 1                                                                                   | 2                                                                                     |
|------------|-------------------------------------------------------------------------------------|---------------------------------------------------------------------------------------|
| Bax        | 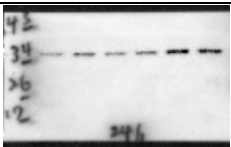 |  |
| Bcl-2      |  |  |
| c-caspase3 |  |  |

|       |                                                                                   |                                                                                     |
|-------|-----------------------------------------------------------------------------------|-------------------------------------------------------------------------------------|
| actin | 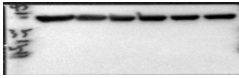 |  |
|-------|-----------------------------------------------------------------------------------|-------------------------------------------------------------------------------------|

Fig. 5E

|         |                                                                                   |                                                                                     |
|---------|-----------------------------------------------------------------------------------|-------------------------------------------------------------------------------------|
|         | 1                                                                                 | 2                                                                                   |
| c-PARP  | 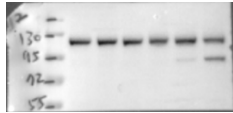 |  |
| Lamin A |  |  |

Figure S1.

(A)

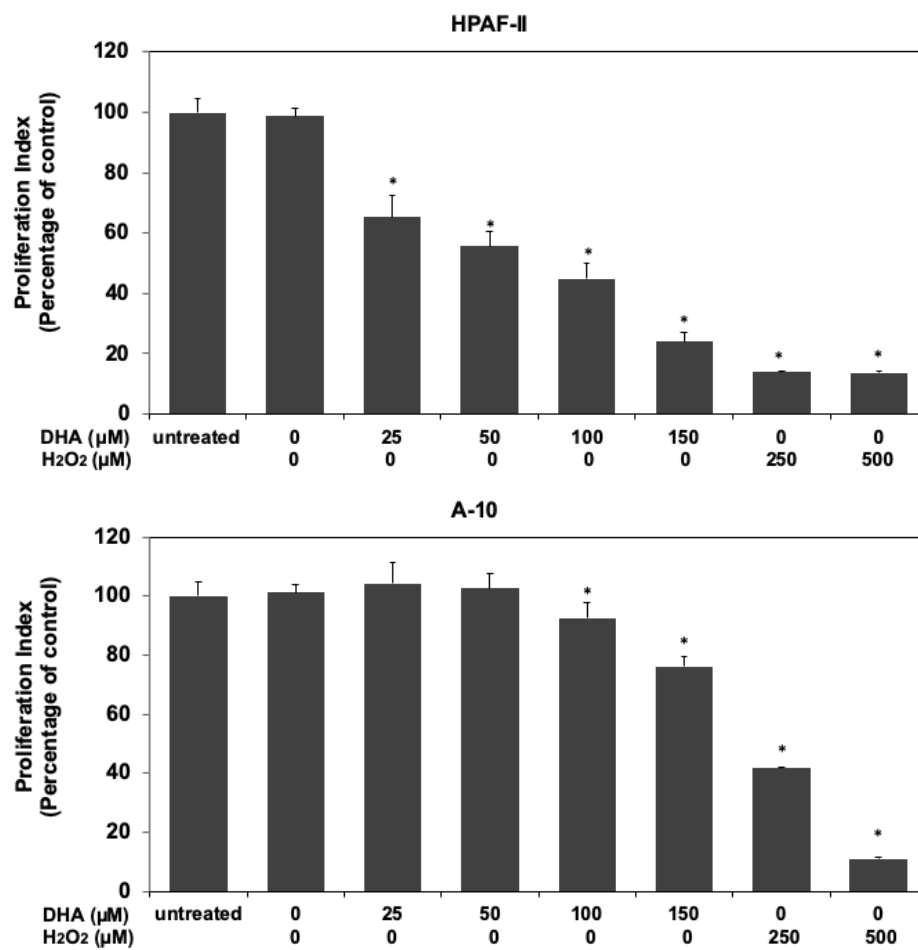

**Table S1.** CC<sub>50</sub> (IC<sub>50</sub>) Values (μM) and Selective Cytotoxicity Index (SCI) of pancreatic cancer cell Lines.

SCI = CC<sub>50</sub> of non-cancerous cells/ CC<sub>50</sub> of cancer cells.

| CC <sub>50</sub> (μM) |          |            |          | SCI     |         |            |
|-----------------------|----------|------------|----------|---------|---------|------------|
| HPAF-II               | CFPAC-1  | MIA-Paca-2 | A-10     | HPAF-II | CFPAC-1 | MIA-Paca-2 |
| 80.71                 | 399.65   | 309.65     | 280.66   | 3.48    | 0.70    | 0.91       |
| SD=6.46               | SD=75.77 | SD=34.84   | SD=26.01 |         |         |            |
